# Supplementary material for: Long‐Term Time‐Varying Risk of Readmission After Acute Myocardial Infarction
Source: PubMed Central journal article supplement — J Am Heart Assoc. 2018 Oct 30;7(21):e009650. doi: 10.1161/JAHA.118.009650 (PMC6404216; doi:10.1161/jaha.118.009650), 2018-10-30
Supplement: JAH3-7-e009650-s001.pdf [file JAH3-7-e009650-s001.pdf]

# **Supplemental Material**

**Table S1. Categorical assignment of principal diagnosis billing codes.**

| <b>Readmission Diagnosis</b>          | <b>Readmission Category</b> | <b>Frequency (%)</b> |
|---------------------------------------|-----------------------------|----------------------|
| Cardiac                               | MI related                  | 137 (15)             |
| Post-operative complication           | MI related                  | 50 (5.6)             |
| Post-operative infection              | MI related                  | 73 (8.2)             |
| Arrhythmia                            | Other CV                    | 57 (6.4)             |
| Coagulopathies                        | Other CV                    | 8 (0.89)             |
| Deep Vein Thrombus/Pulmonary Embolism | Other CV                    | 7 (0.78)             |
| Fluid-Heart Failure                   | Other CV                    | 105 (12)             |
| Endocrine                             | Non CV                      | 7 (0.78)             |
| Fluid - Pleural Effusion              | Non CV                      | 4 (0.45)             |
| Gastrointestinal                      | Non CV                      | 48 (5.4)             |
| Genitourinary                         | Non CV                      | 3 (0.34)             |
| Hematologic                           | Non CV                      | 10 (1.1)             |
| Infection                             | Non CV                      | 76 (8.5)             |
| Miscellaneous                         | Non CV                      | 101 (11)             |
| Neurologic                            | Non CV                      | 31 (3.5)             |
| Pulmonary                             | Non CV                      | 43 (4.8)             |
| Renal                                 | Non CV                      | 21 (2.3)             |
| Elective (Planned)                    | Planned                     | 113 (13)             |

Figure S1 has been added to visualize that overall readmissions can be modelled by an early decreasing phase and a constant phase. Figures S2A-D have also been added to visualize the different phases comprised in the modelling for each readmission group.

**Figure S1. Twelve-month instantaneous risk (hazard function phases) of readmission after myocardial infarction.**

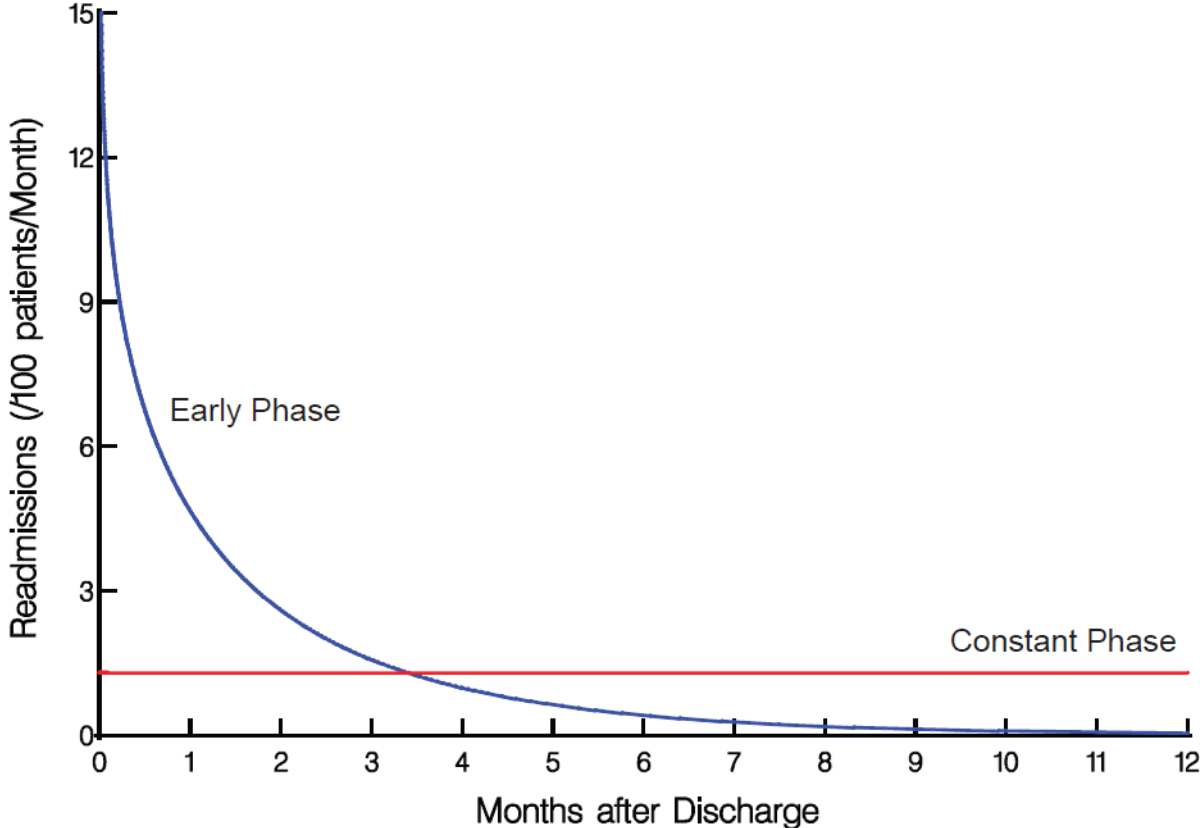

Blue = early phase; red = constant phase.

**Figure S2A. Twelve-month instantaneous risk (hazard function phases) of readmission after myocardial infarction for myocardial infarction related readmissions.**

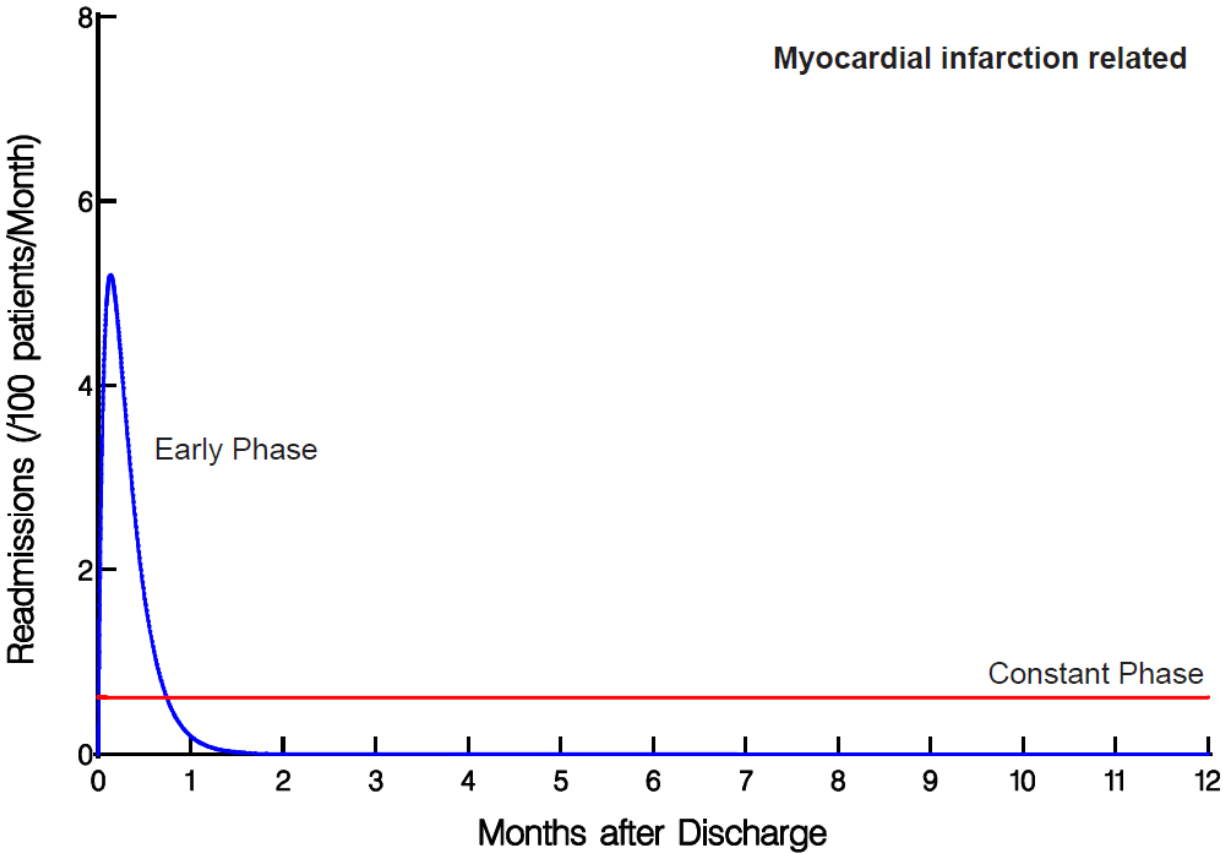

Blue = early phase; red = constant phase.

**Figure S2B. Twelve-month instantaneous risk (hazard function phases) of readmission after myocardial infarction for non-cardiovascular related readmissions.**

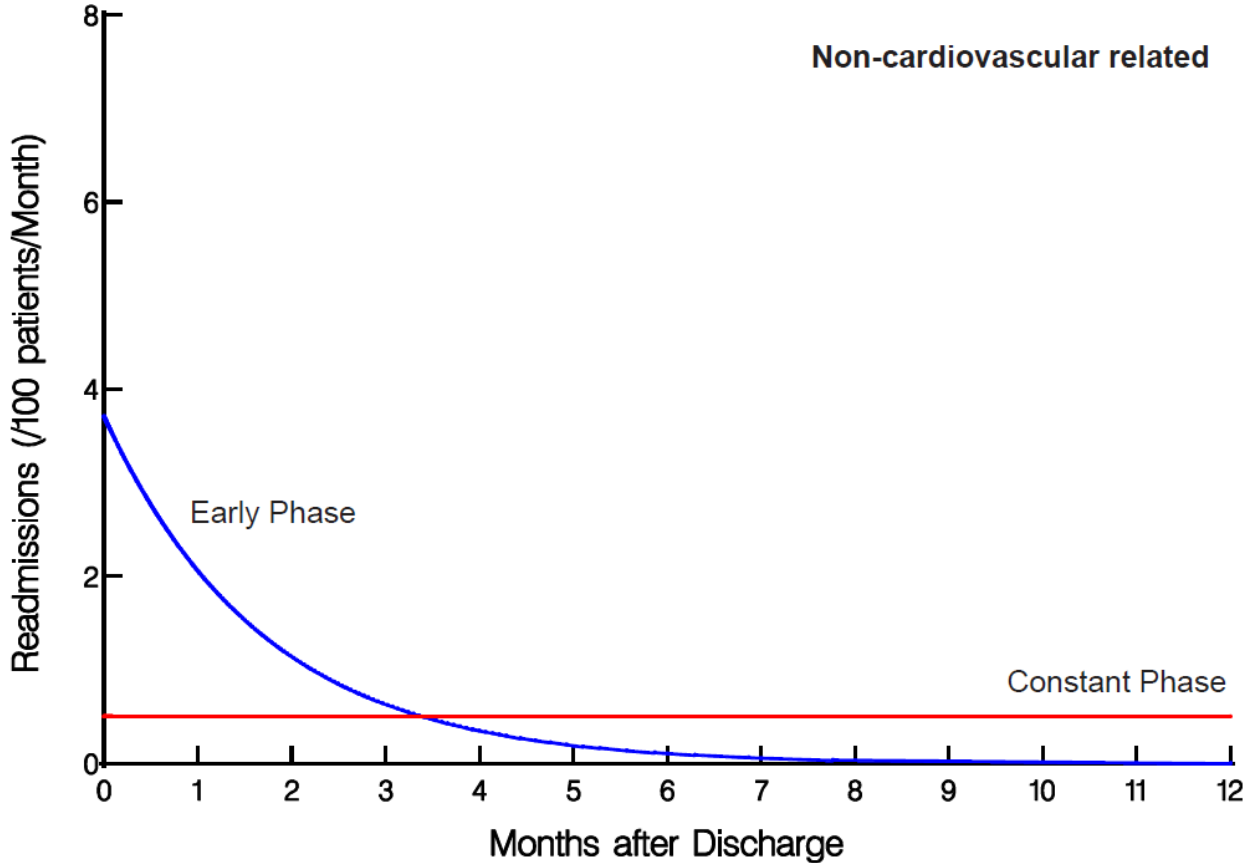

Blue = early phase; red = constant phase.

**Figure S2C. Twelve-month instantaneous risk (hazard function phases) of readmission after myocardial infarction for other cardiovascular related readmissions.**

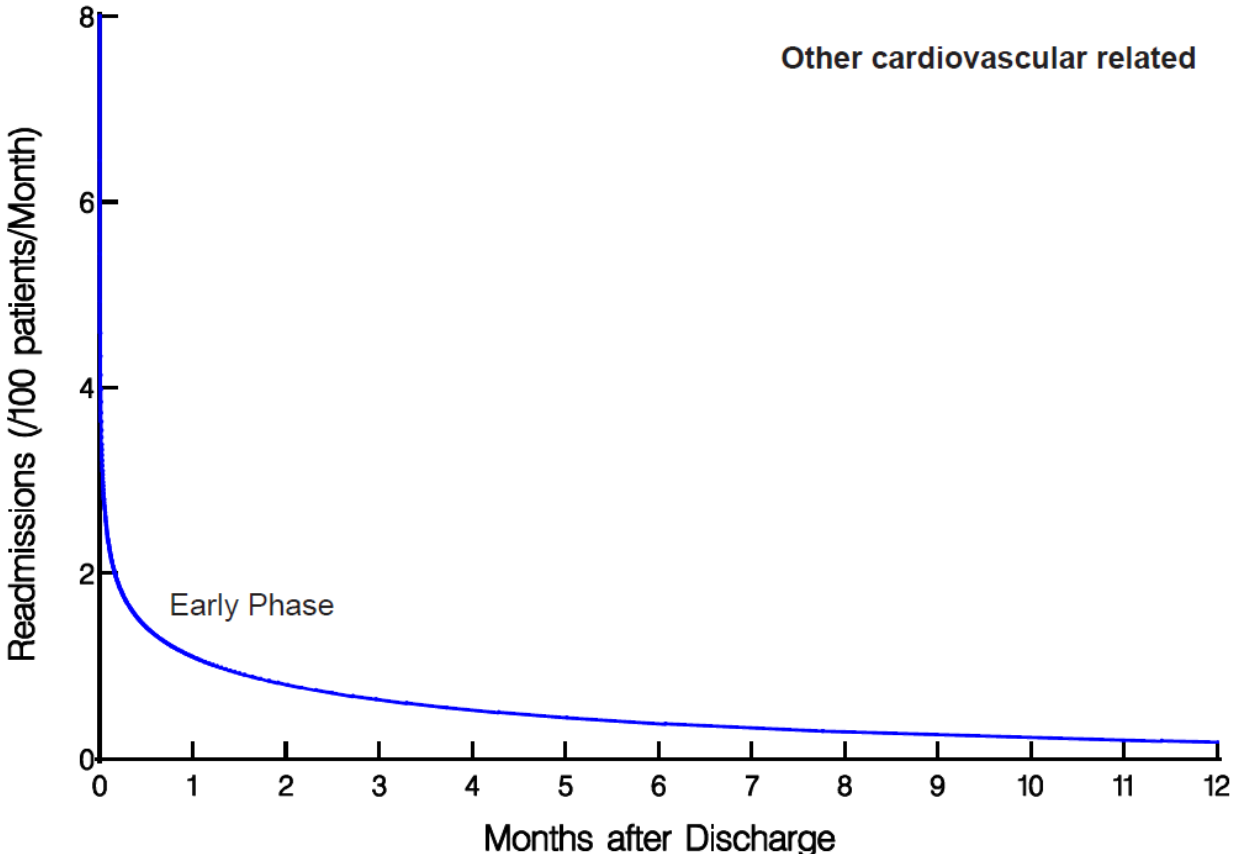

Blue = early phase.

**Figure S2D. Twelve-month instantaneous risk (hazard function phases) of readmission after myocardial infarction for planned readmissions.**

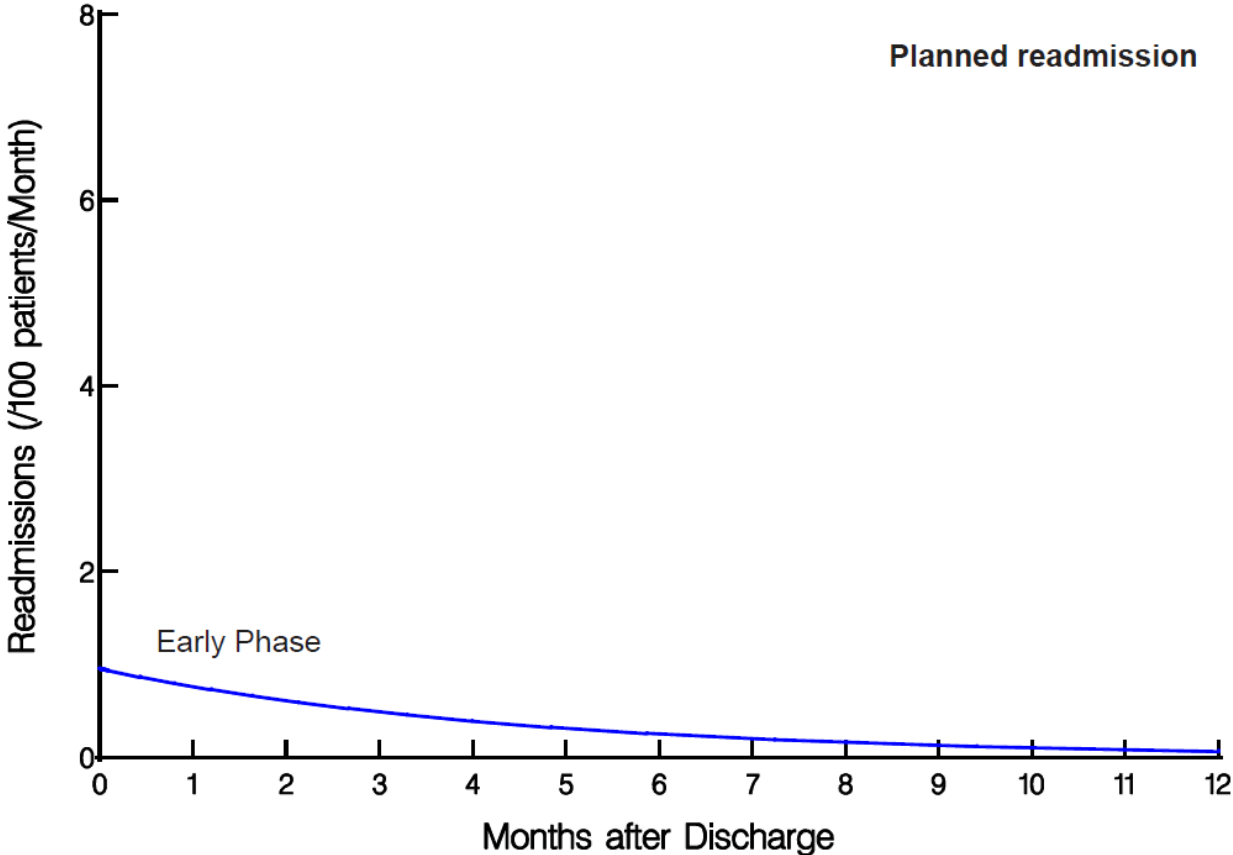

Blue = early phase.
